# Supplementary material
Source: PubMed Central journal article supplement (PMC2585490)
Supplement: NIHMS72020-supplement-supplement_1.pdf [file NIHMS72020-supplement-supplement_1.pdf]

**Current Author Addresses:** Dr. Belle: University of Pittsburgh, 130 DeSoto Street, Pittsburgh, PA 15261.

Dr. Burgio: University of Alabama, Box 870315, Tuscaloosa, AL 35487-0315.

Drs. Burns, Martindale-Adams, and Nichols: University of Tennessee, Veterans Affairs Medical Center, 1030 Jefferson, Memphis, TN 38104.

Dr. Coon: Department of Social and Behavioral Sciences, Arizona State University, 4701 West Thunderbird Road, MC 3051, Glendale, AZ 85346.

Dr. Czaja and Ms. Lee: University of Miami Miller School of Medicine, 1695 NW 9th Avenue, Miami, FL 33136.

Dr. Gallagher-Thompson: Stanford University, 795 Willow Road (182C/MP), Menlo Park, CA 94025.

Drs. Gitlin and Winter: Thomas Jefferson University, 130 South 9th Street, Philadelphia, PA 19107.

Ms. Klinger: University of Pittsburgh, 121 University Place, Pittsburgh, PA 15260.

Dr. Koepke: National Institutes of Health, National Center for Research Resources, 6701 Democracy Boulevard, Suite 710, Bethesda, MD 20892-4870.

Dr. Schulz: University of Pittsburgh, 121 University Place, 6th Floor, Pittsburgh, PA 15260.

Dr. Stahl: National Institute on Aging, 7201 Wisconsin Avenue, #533, Bethesda, MA 20892.

Dr. Stevens: Scott & White Memorial Hospital, 2401 South 31st Street, Temple, TX 76508.

Ms. Zhang: Graduate School of Public Health, University of Pittsburgh, 130 DeSoto Street, Pittsburgh, PA 15281.

**Author Contributions:** Conception and design: S.H. Belle, L. Burgio, R. Burns, D. Coon, S.J. Czaja, D. Gallagher-Thompson, L.N. Gitlin, J. Martindale-Adams, L. Nichols, R. Schulz, S. Stahl, A. Stevens.

Analysis and interpretation of the data: S.H. Belle, L. Burgio, R. Burns, S.J. Czaja, L.N. Gitlin, R. Schulz, S. Stahl, S. Zhang.

Drafting of the article: S.H. Belle, L. Burgio, D. Coon, S.J. Czaja, D. Gallagher-Thompson, L.N. Gitlin, J. Klinger, R. Schulz.

Critical revision of the article for important intellectual content: S.H. Belle, L. Burgio, D. Coon, S.J. Czaja, D. Gallagher-Thompson, L.N. Gitlin, J. Klinger, K.M. Koepke, R. Schulz, S. Zhang.

Final approval of the article: S.H. Belle, L. Burgio, R. Burns, S.J. Czaja, D. Gallagher-Thompson, L.N. Gitlin, K.M. Koepke, J. Martindale-Adams, L. Nichols, R. Schulz, S. Stahl, S. Zhang.

Provision of study materials or patients: L. Burgio, R. Burns, D. Coon, S.J. Czaja, D. Gallagher-Thompson, L.N. Gitlin, J. Klinger, J. Martindale-Adams, L. Nichols, R. Schulz, A. Stevens.

Statistical expertise: S.H. Belle, R. Schulz, S. Zhang.

Obtaining of funding: S.H. Belle, L. Burgio, R. Burns, D. Coon, S.J. Czaja, D. Gallagher-Thompson, L.N. Gitlin, K.M. Koepke, J. Martindale-Adams, L. Nichols, R. Schulz, S. Stahl.

Administrative, technical, or logistic support: D. Coon, D. Gallagher-Thompson, L.N. Gitlin, J. Klinger, C.C. Lee, R. Schulz, S. Stahl, L. Winter.

Collection and assembly of data: D. Coon, S.J. Czaja, D. Gallagher-Thompson, L.N. Gitlin, J. Martindale-Adams, L. Nichols, R. Schulz, A. Stevens, L. Winter, S. Zhang.

31. Pfeiffer E. A short portable mental status questionnaire for the assessment of organic brain deficit in elderly patients. *J Am Geriatr Soc.* 1975;23:433-41.

[PMID: 1159263]

32. Schulz R, Mendelsohn AB, Haley WE, Mahoney D, Allen RS, Zhang S, et al. End-of-life care and the effects of bereavement on family caregivers of persons with dementia. *N Engl J Med.* 2003;349:1936-42. [PMID: 14614169]

33. Schulz R, Belle SH, Czaja SJ, McGinnis KA, Stevens A, Zhang S. Long-term care placement of dementia patients and caregiver health and well-being. *JAMA.* 2004;292:961-7. [PMID: 15328328]

## APPENDIX: NONRESPONDERS AND MISSING DATA

We completed follow-up interviews for 89% of 212 Hispanic or Latino caregivers, 93% of 219 white or Caucasian caregivers, and 90% of 211 black or African American caregivers, with no statistically significant differences by treatment group. Comparing selected characteristics for the 582 participants with those of the 60 randomized participants for whom outcome data were not available within each racial or ethnic group indicated that caregivers with follow-up data were similar at baseline to the group of caregivers who withdrew consent ( $n = 35$ ), could not be located ( $n = 22$ ), died ( $n = 1$ ), or had to be excluded from the study after randomization ( $n = 2$ ). The only statistically significant ( $P < 0.05$ ) differences were in Hispanic or Latino caregivers. Those without the 6-month follow-up had lower CES-D scores and higher social support scores at baseline than those with follow-up data.

Because caregivers of care recipients who were institutionalized continued to be involved in caregiving, we administered the complete outcomes battery and included the caregivers in the primary outcomes analysis. Neither burden nor problem behaviors were relevant outcome measures when care recipients died ( $n = 41$ ), so caregivers of these recipients did not have data on all primary outcome component measures, and we therefore did not include them in the primary outcome analyses. Another 23 participants were missing data for at least 1 component of the outcome measure, so 518 (89%) of the 582 caregivers with a 6-month interview had complete data for all 5 indicators on the multivariate outcome measure.

Hispanic or Latino care recipients of caregivers who were included in the primary outcome analyses had significantly fewer ( $P = 0.045$ ) activities of daily living (ADL) impairments (median ADL, 4 [interquartile range (IQR), 1 to 5]) and higher ( $P = 0.030$ ) cognitive function (median MMSE score, 11 [IQR, 7 to 18]) compared with the 44 Hispanic or Latino care recipients of caregivers who were not included in the analysis (median ADL, 4.5 [IQR, 3 to 6]; median MMSE score, 9.5 [IQR, 5.5 to 14]). These factors are associated with both care recipient death and institutionalization (32, 33). Furthermore, white or Caucasian care recipients whose caregivers were included in the primary outcome analyses were significantly younger (median age, 79.2 years [IQR, 73.8 to 84.3 years];  $P = 0.003$ ) than the 37 white or Caucasian care recipients whose caregivers were missing follow-up data (median age, 84.1 years [IQR, 78.3 to 87.8 years]).

**Appendix Table 1. Reasons for Ineligibility\***

| Reason for Ineligibility                                                                     | Participants, <i>n</i> |
|----------------------------------------------------------------------------------------------|------------------------|
| Caregiver provides <4 hours of care per day                                                  | 28                     |
| Care recipient likely to be placed within 6 months                                           | 6                      |
| Care recipient has been hospitalized >3 times in the past year                               | 31                     |
| Caregiver did not meet self-report caregiver distress criterion†                             | 85                     |
| Caregiver is cognitively impaired (4 incorrect responses to SPMSQ)                           | 1                      |
| Caregiver enrolled in another caregiving study or caregiver or care recipient was in REACH I | 12                     |
| Other reasons‡                                                                               | 33                     |
| Total§                                                                                       | 196                    |

\* REACH = Resources for Enhancing Alzheimer's Caregiver Health; SPMSQ = Short Portable Mental Status Questionnaire (31).

† For example, felt stressed, felt overwhelmed, had crying spells, felt cut off from family or friends, or was angry because of caregiving.

‡ Other reasons were that the caregiver was not willing to install a telephone; caregiver did not have a telephone line; caregiver or care recipient had cancer; or care recipient was mentally ill, had a head injury, was blind, or was deaf.

§ Some caregivers met several exclusion criteria; the number excluded on the basis of screening was 171.

**Appendix Table 2. Reasons for Unavailable End Points and Types of 6-Month Follow-up**

| Variable                                                                     | Hispanic or Latino Participants, <i>n</i> |              | White or Caucasian Participants, <i>n</i> |              | Black or African-American Participants, <i>n</i> |              |
|------------------------------------------------------------------------------|-------------------------------------------|--------------|-------------------------------------------|--------------|--------------------------------------------------|--------------|
|                                                                              | Control                                   | Intervention | Control                                   | Intervention | Control                                          | Intervention |
| Reasons for unavailable end points                                           |                                           |              |                                           |              |                                                  |              |
| Caregiver withdrew consent                                                   | 6                                         | 8            | 5                                         | 6            | 5                                                | 5            |
| Caregiver could not be located                                               | 6                                         | 4            | 2                                         | 1            | 5                                                | 4            |
| Caregiver died                                                               | 0                                         | 0            | 0                                         | 0            | 1                                                | 0            |
| Caregiver was excluded from study (potential danger to interventionist)      | 0                                         | 0            | 0                                         | 1            | 0                                                | 1            |
| Type of 6-month follow-up                                                    |                                           |              |                                           |              |                                                  |              |
| Regular follow-up                                                            | 84                                        | 86           | 73                                        | 91           | 84                                               | 80           |
| Placement follow-up                                                          | 6                                         | 1            | 13                                        | 6            | 4                                                | 2            |
| Bereavement follow-up                                                        | 4                                         | 6            | 9                                         | 6            | 6                                                | 10           |
| Abbreviated follow-up (caregivers were unwilling to complete entire battery) | 0                                         | 1            | 4                                         | 2            | 2                                                | 2            |

**Appendix Table 3. Sessions, Session Types, and Time of Sessions by Race or Ethnicity\***

| Variable                                                          | Total           | Hispanic or Latino | White or Caucasian | Black or African American |
|-------------------------------------------------------------------|-----------------|--------------------|--------------------|---------------------------|
| Intervention participants, <i>n</i>                               | 323             | 106                | 113                | 104                       |
| Median (IQR) number of sessions (maximum, 12), <i>n</i>           | 12 (9–12)       | 12 (10–12)         | 12 (11–12)         | 11 (7.5–12)               |
| Median (IQR) number of in-home sessions, <i>n</i>                 | 9 (8–9)         | 9 (8–10)           | 9 (8–10)           | 8 (6–9)                   |
| Median (IQR) number of telephone sessions, <i>n</i>               | 2 (2–3)         | 2 (2–3)            | 2 (2–3)            | 2 (2–3)                   |
| Median (IQR) number of support group calls (maximum, 5), <i>n</i> | 3 (2–4)         | 2 (2–4)            | 4 (3–5)            | 3 (2–4)                   |
| Median (IQR) total time, <i>h</i>                                 | 14.3 (9.6–17.2) | 16.1 (10.5–19.0)   | 14.3 (10.7–16.6)   | 12.8 (8.2–15.5)           |
| Median (IQR) in-home session time, <i>h</i>                       | 13.3 (9.7–15.5) | 15.0 (10.7–17.8)   | 13.0 (10.0–15.3)   | 12.3 (8.6–14.4)           |
| Median (IQR) telephone session time, <i>h</i>                     | 1.2 (0.7–1.8)   | 1.4 (0.9–2.1)      | 1.1 (0.8–1.5)      | 1.1 (0.7–1.7)             |
| Median (IQR) time of support group calls, <i>h</i>                | 3.3 (2.1–4.4)   | 2.4 (1.9–4.1)      | 3.8 (2.3–4.8)      | 3.3 (2.5–4.6)             |
| Completed 12 sessions, %                                          | 60              | 69                 | 65                 | 47                        |
| Completed 9–11 sessions, %                                        | 17              | 7                  | 20                 | 22                        |
| Completed 5 support group calls, %                                | 12              | 7                  | 20                 | 10                        |
| Completed ≥1 support group call, %                                | 66              | 58                 | 75                 | 64                        |
| No intervention, %                                                | 5               | 8                  | 2                  | 7                         |
| Control participants, <i>n</i>                                    | 319             | 106                | 106                | 107                       |
| Received both calls, <i>n</i>                                     | 90              | 87                 | 94                 | 88                        |

\* IQR = interquartile range.

**Appendix Table 4. Baseline Values and Results of the Resources for Enhancing Alzheimer's Caregiver Health (REACH) II Study\***

| Variable                                                                     | Caregiver Burden Score (Range, 0–44) | Depression Score (Range, 0–30) | Self-Care Score (Range, 0–11) | Social Support Score (Range, 0–30) | Problem Behaviors Score (Range, 3–15) | Common Treatment Effect across Outcomes (95% CI) |
|------------------------------------------------------------------------------|--------------------------------------|--------------------------------|-------------------------------|------------------------------------|---------------------------------------|--------------------------------------------------|
| <b>Hispanic</b>                                                              |                                      |                                |                               |                                    |                                       |                                                  |
| Control (n = 86)                                                             |                                      |                                |                               |                                    |                                       |                                                  |
| Mean (SD) baseline score                                                     | 17.4 (9.9)                           | 10.4 (7.3)                     | 4.6 (2.2)                     | 13.4 (5.4)                         | 10.6 (2.8)                            |                                                  |
| Mean (SD) 6-mo follow-up score                                               | 15.9 (9.9)                           | 9.6 (7.1)                      | 4.3 (2.5)                     | 12.6 (5.6)                         | 10.7 (2.8)                            |                                                  |
| Mean (SD) change†                                                            | -1.5 (7.2)                           | -0.8 (5.0)                     | -0.2 (2.2)                    | -0.8 (4.7)                         | 0.1 (3.2)                             |                                                  |
| Mean (SD) standardized change‡                                               | -0.2 (0.9)                           | -0.2 (1.0)                     | -0.1 (0.9)                    | -0.2 (1.0)                         | 0.0 (1.0)                             |                                                  |
| Intervention (n = 82)                                                        |                                      |                                |                               |                                    |                                       |                                                  |
| Mean (SD) baseline score                                                     | 16.9 (9.6)                           | 10.9 (7.2)                     | 4.8 (2.5)                     | 13.8 (5.3)                         | 10.6 (2.8)                            |                                                  |
| Mean (SD) 6-mo follow-up score                                               | 14.9 (9.1)                           | 8.6 (6.9)                      | 3.8 (2.8)                     | 12.7 (5.1)                         | 9.2 (2.9)                             |                                                  |
| Mean (SD) change†                                                            | -2.0 (9.1)                           | -2.4 (5.4)                     | -1.0 (2.7)                    | -1.1 (5.0)                         | -1.5 (2.8)                            |                                                  |
| Mean (SD) standardized change‡                                               | -0.3 (1.1)                           | -0.5 (1.0)                     | -0.4 (1.1)                    | -0.2 (1.0)                         | -0.5 (0.9)                            |                                                  |
| Estimated difference (±SE) in 6-mo change between treatment groups (n = 168) |                                      |                                |                               |                                    |                                       |                                                  |
| Unadjusted standardized§                                                     | -0.1 ± 0.1                           | -0.3 ± 0.1                     | -0.3 ± 0.1                    | -0.1 ± 0.1                         | -0.5 ± 0.1                            | -0.3 ± 0.1 (-0.4 to -0.1)                        |
| P value for treatment                                                        | 0.66                                 | 0.054                          | 0.042                         | 0.68                               | 0.001                                 | <0.001                                           |
| Adjusted standardized                                                        | -0.1 ± 0.1                           | -0.3 ± 0.1                     | -0.3 ± 0.1                    | -0.1 ± 0.1                         | -0.5 ± 0.1                            | -0.3 ± 0.1 (-0.5 to -0.1)                        |
| P value for treatment                                                        | 0.46                                 | 0.047                          | 0.028                         | 0.57                               | <0.001                                | <0.001                                           |
| Adjusted by using original scale¶                                            | -2.3 ± 7.6                           | -1.6 ± 5.3                     | -0.8 ± 2.5                    | -1.5 ± 4.9                         | -0.9 ± 3.1                            |                                                  |
| <b>White</b>                                                                 |                                      |                                |                               |                                    |                                       |                                                  |
| Control (n = 86)                                                             |                                      |                                |                               |                                    |                                       |                                                  |
| Mean (SD) baseline score                                                     | 18.8 (9.3)                           | 10.6 (6.6)                     | 3.7 (2.3)                     | 12.0 (6.0)                         | 11.1 (2.4)                            |                                                  |
| Mean (SD) 6-mo follow-up score                                               | 17.7 (9.6)                           | 9.1 (6.0)                      | 3.7 (2.3)                     | 11.5 (6.2)                         | 11.1 (2.7)                            |                                                  |
| Mean (SD) change†                                                            | -1.2 (6.1)                           | -1.5 (4.6)                     | -0.0 (1.9)                    | -0.5 (5.1)                         | -0.1 (2.8)                            |                                                  |
| Mean (SD) standardized change‡                                               | -0.2 (0.9)                           | -0.3 (0.9)                     | -0.0 (1.0)                    | -0.1 (1.0)                         | -0.0 (1.0)                            |                                                  |
| Intervention (n = 96)                                                        |                                      |                                |                               |                                    |                                       |                                                  |
| Mean (SD) baseline score                                                     | 18.7 (7.8)                           | 9.5 (5.5)                      | 4.0 (2.1)                     | 11.7 (5.3)                         | 10.7 (2.6)                            |                                                  |
| Mean (SD) 6-mo follow-up score                                               | 17.0 (8.0)                           | 7.8 (5.2)                      | 3.5 (2.0)                     | 10.1 (5.3)                         | 10.1 (2.4)                            |                                                  |
| Mean (SD) change†                                                            | -1.8 (7.0)                           | -1.7 (5.5)                     | -0.4 (1.9)                    | -1.7 (4.6)                         | -0.6 (2.9)                            |                                                  |
| Mean (SD) standardized change‡                                               | -0.3 (1.1)                           | -0.3 (1.1)                     | -0.2 (1.0)                    | -0.3 (1.0)                         | -0.2 (1.0)                            |                                                  |
| Estimated difference (±SE) in 6-mo change between treatment groups (n = 182) |                                      |                                |                               |                                    |                                       |                                                  |
| Unadjusted standardized§                                                     | -0.1 (0.1)                           | -0.0 (0.1)                     | -0.2 (0.1)                    | -0.2 (0.1)                         | -0.2 (0.1)                            | -0.2 ± 0.1 (-0.4 to -0.0)                        |
| P value for treatment                                                        | 0.53                                 | 0.69                           | 0.149                         | 0.117                              | 0.185                                 | 0.037                                            |
| Adjusted standardized                                                        | -0.1 (0.1)                           | -0.0 (0.1)                     | -0.2 (0.1)                    | -0.2 (0.1)                         | -0.2 (0.1)                            | -0.2 ± 0.1 (-0.4 to -0.0)                        |
| P value for treatment                                                        | 0.51                                 | 0.69                           | 0.146                         | 0.112                              | 0.167                                 | 0.032                                            |
| Adjusted by using original scale¶                                            | -1.2 (6.6)                           | -0.9 (5.1)                     | -0.3 (1.9)                    | -0.9 (4.9)                         | -0.5 (2.9)                            |                                                  |
| <b>Black</b>                                                                 |                                      |                                |                               |                                    |                                       |                                                  |
| Control (n = 85)                                                             |                                      |                                |                               |                                    |                                       |                                                  |
| Mean (SD) baseline score                                                     | 15.3 (8.7)                           | 8.9 (6.0)                      | 4.3 (2.3)                     | 12.1 (5.4)                         | 10.0 (2.6)                            |                                                  |
| Mean (SD) 6-mo follow-up score                                               | 14.3 (8.3)                           | 7.7 (6.5)                      | 4.2 (2.3)                     | 11.1 (5.8)                         | 9.9 (3.1)                             |                                                  |
| Mean (SD) change†                                                            | -1.0 (6.4)                           | -1.2 (5.0)                     | -0.1 (1.8)                    | -1.1 (5.4)                         | -0.1 (3.0)                            |                                                  |
| Mean (SD) standardized change‡                                               | -0.2 (1.0)                           | -0.3 (0.9)                     | -0.0 (1.0)                    | -0.2 (1.0)                         | -0.0 (1.0)                            |                                                  |
| Intervention (n = 83)                                                        |                                      |                                |                               |                                    |                                       |                                                  |
| Mean (SD) baseline score                                                     | 15.5 (7.2)                           | 9.3 (6.2)                      | 4.2 (2.0)                     | 11.8 (6.3)                         | 9.2 (2.4)                             |                                                  |
| Mean (SD) 6-mo follow-up score                                               | 12.7 (6.5)                           | 7.5 (5.4)                      | 3.8 (2.1)                     | 9.7 (5.7)                          | 9.4 (2.5)                             |                                                  |
| Mean (SD) change†                                                            | -2.8 (6.5)                           | -1.8 (6.0)                     | -0.4 (2.0)                    | -2.1 (4.9)                         | 0.3 (3.1)                             |                                                  |
| Mean (SD) standardized change‡                                               | -0.4 (1.0)                           | -0.3 (1.1)                     | -0.2 (1.0)                    | -0.4 (0.9)                         | 0.1 (1.0)                             |                                                  |
| Estimated difference (±SE) in 6-mo change between treatment groups (n = 168) |                                      |                                |                               |                                    |                                       |                                                  |
| Unadjusted standardized§                                                     | -0.3 (0.2)                           | -0.1 (0.2)                     | -0.2 (0.2)                    | -0.2 (0.2)                         | 0.1 (0.2)                             | -0.1 ± 0.1 (-0.3 to 0.1)                         |
| P value for treatment                                                        | 0.080                                | 0.48                           | 0.23                          | 0.186                              | 0.49                                  | 0.24                                             |
| Adjusted standardized                                                        | -0.3 (0.2)                           | -0.1 (0.2)                     | -0.2 (0.2)                    | -0.2 (0.2)                         | 0.1 (0.2)                             | -0.1 ± 0.1 (-0.3 to 0.1)                         |
| P value for treatment                                                        | 0.078                                | 0.49                           | 0.23                          | 0.181                              | 0.53                                  | 0.23                                             |
| Adjusted by using original scale¶                                            | -0.7 (6.5)                           | -0.6 (5.5)                     | -0.2 (1.9)                    | -0.6 (5.1)                         | -0.3 (3.1)                            |                                                  |

\* Lower values for baseline and 6-mo follow-up scores indicate more positive outcomes. Negative values for change scores indicate improvement from baseline to 6 mo.  
 † Change in score = 6-mo follow-up score - baseline score.  
 ‡ Standardized change in score = change in score ÷ SD for each race or ethnic group.  
 § Unadjusted standardized differences of change in scores between treatment groups for each individual outcome are estimates of the treatment effect by using simple linear regression models. The treatment effects across outcomes are estimates from simple generalized estimating equation models.  
 || Adjusted standardized differences of change between treatment groups for each individual outcome are estimates of treatment effects based on multiple linear regression models adjusted for caregiver relationship to care recipient (spouse or nonspouse) and care recipient's education in Hispanic or Latino people, relationship to care recipient in white or Caucasian people, and relationship to care recipient in black or African-American people. The treatment effects across outcomes are estimates from simple generalized estimating equation models adjusted for the same covariates.  
 ¶ The SD of the pooled change score in the original scale is reported in parentheses.

**Appendix Table 5. Benefits of Participating in Study by Race or Ethnicity and Treatment Group\***

| Question                                                                                      | Hispanic or Latino<br>Participants, n (%) |                           | White or Caucasian<br>Participants, n (%) |                           | Black or African-American<br>Participants, n (%) |                           |
|-----------------------------------------------------------------------------------------------|-------------------------------------------|---------------------------|-------------------------------------------|---------------------------|--------------------------------------------------|---------------------------|
|                                                                                               | Control<br>(n = 106)                      | Intervention<br>(n = 106) | Control<br>(n = 106)                      | Intervention<br>(n = 113) | Control<br>(n = 107)                             | Intervention<br>(n = 104) |
| Do you think you benefited from participating in this project?                                |                                           |                           |                                           |                           |                                                  |                           |
| Not at all                                                                                    | 20 (22.0)                                 | 0 (0.0)                   | 25 (26.9)                                 | 0 (0.0)                   | 14 (15.4)                                        | 1 (1.1)                   |
| Some                                                                                          | 37 (40.7)                                 | 17 (18.5)                 | 51 (54.8)                                 | 36 (35.0)                 | 43 (47.3)                                        | 14 (15.6)                 |
| A great deal                                                                                  | 34 (37.4)                                 | 75 (81.5)                 | 17 (18.3)                                 | 67 (65.0)                 | 34 (37.4)                                        | 75 (83.3)                 |
| Did participation in the project help you better understand memory loss and its effect?       |                                           |                           |                                           |                           |                                                  |                           |
| Not at all                                                                                    | 17 (18.7)                                 | 2 (2.2)                   | 40 (43.0)                                 | 7 (6.8)                   | 16 (17.2)                                        | 1 (1.1)                   |
| Some                                                                                          | 38 (41.8)                                 | 19 (20.7)                 | 39 (41.9)                                 | 36 (35.0)                 | 35 (37.6)                                        | 19 (20.9)                 |
| A great deal                                                                                  | 36 (39.6)                                 | 71 (77.2)                 | 14 (15.1)                                 | 60 (58.3)                 | 42 (45.2)                                        | 71 (78.0)                 |
| Did participation in the project help you feel more confident in dealing with care recipient? |                                           |                           |                                           |                           |                                                  |                           |
| Not at all                                                                                    | 24 (26.4)                                 | 0 (0.0)                   | 42 (44.7)                                 | 2 (1.9)                   | 19 (20.7)                                        | 0 (0.0)                   |
| Some                                                                                          | 38 (41.8)                                 | 14 (15.2)                 | 35 (37.2)                                 | 40 (38.8)                 | 35 (38.0)                                        | 24 (26.7)                 |
| A great deal                                                                                  | 29 (31.9)                                 | 78 (84.8)                 | 17 (18.1)                                 | 61 (59.2)                 | 38 (41.3)                                        | 66 (73.3)                 |
| Did participation in the project help make your life easier?                                  |                                           |                           |                                           |                           |                                                  |                           |
| Not at all                                                                                    | 29 (31.9)                                 | 5 (5.5)                   | 61 (64.9)                                 | 8 (7.8)                   | 26 (28.0)                                        | 3 (3.3)                   |
| Some                                                                                          | 37 (40.7)                                 | 21 (23.1)                 | 25 (26.6)                                 | 60 (58.3)                 | 47 (50.5)                                        | 37 (40.7)                 |
| A great deal                                                                                  | 25 (27.5)                                 | 65 (71.4)                 | 8 (8.5)                                   | 35 (34.0)                 | 20 (21.5)                                        | 51 (56.0)                 |
| Did participation in the project help your ability to care for care recipient?                |                                           |                           |                                           |                           |                                                  |                           |
| Not at all                                                                                    | 24 (26.4)                                 | 1 (1.1)                   | 50 (53.8)                                 | 8 (7.8)                   | 21 (22.8)                                        | 2 (2.2)                   |
| Some                                                                                          | 38 (41.8)                                 | 22 (24.2)                 | 35 (37.6)                                 | 48 (46.6)                 | 44 (47.8)                                        | 27 (30.0)                 |
| A great deal                                                                                  | 29 (31.9)                                 | 68 (74.7)                 | 8 (8.6)                                   | 47 (45.6)                 | 27 (29.3)                                        | 61 (67.8)                 |
| Did participation in the project help improve care recipient's life?                          |                                           |                           |                                           |                           |                                                  |                           |
| Not at all                                                                                    | 27 (30.0)                                 | 5 (5.5)                   | 67 (71.3)                                 | 16 (15.8)                 | 30 (32.3)                                        | 5 (5.6)                   |
| Some                                                                                          | 38 (42.2)                                 | 25 (27.5)                 | 20 (21.3)                                 | 57 (56.4)                 | 46 (49.5)                                        | 52 (57.8)                 |
| A great deal                                                                                  | 25 (27.8)                                 | 61 (67.0)                 | 7 (7.4)                                   | 28 (27.7)                 | 17 (18.3)                                        | 33 (36.7)                 |
| Did participation in the project help to keep care recipient at home?                         |                                           |                           |                                           |                           |                                                  |                           |
| Not at all                                                                                    | 33 (36.7)                                 | 10 (11.2)                 | 73 (78.5)                                 | 42 (41.2)                 | 34 (37.4)                                        | 17 (19.1)                 |
| Some                                                                                          | 28 (31.1)                                 | 17 (19.1)                 | 8 (8.6)                                   | 24 (23.5)                 | 29 (31.9)                                        | 25 (28.1)                 |
| A great deal                                                                                  | 29 (32.2)                                 | 62 (69.7)                 | 12 (12.9)                                 | 36 (35.3)                 | 28 (30.8)                                        | 47 (52.8)                 |

\* For all questions,  $P < 0.001$  for intervention vs. control.
